# Supplementary material for: Activating HfX2 (X = S, Se and Te) for the hydrogen evolution reaction by introducing defects: a first-principles study
Source: Royal Society of Chemistry journal article supplement (doi:10.1039/d3cp01830j), 2023-01-01
Supplement: d3cp01830j1.pdf [file d3cp01830j1.pdf]

## Supplementary Information

Jiawei Chen<sup>a,#</sup>, Runqing Zhang<sup>b,#</sup>, Jiasheng Luo<sup>a</sup>, Huafeng Dong<sup>b,c,\*</sup>, Jiachun Cao<sup>d,\*</sup>, Haojun Ling<sup>b</sup>, Chuyu Li<sup>b</sup>, Minru Wen<sup>b</sup> and Fugen Wu<sup>e</sup>

### AFFILIATIONS

<sup>a</sup> School of Chemical Engineering and Light Industry, Guangdong University of Technology, Guangzhou 510006, China

<sup>b</sup> School of Physics and Optoelectronic Engineering, Guangdong University of Technology, Guangzhou 510006, China

<sup>c</sup> Guangdong provincial Key Laboratory of Information Photonics Technology, Guangdong University of Technology, Guangzhou 510006, China

<sup>d</sup> Institute of Environmental Health and Pollution Control, School of Environmental Science and Engineering, Guangdong University of Technology, Guangzhou, China

<sup>e</sup> School of Materials and Energy, Guangdong University of Technology, Guangzhou 510006, China

<sup>#</sup> Jiawei Chen and Runqing Zhang made equal contributions to this work

\* E-mail address: [hfdong@gdut.edu.cn](mailto:hfdong@gdut.edu.cn) and [caojiachun98@163.com](mailto:caojiachun98@163.com).

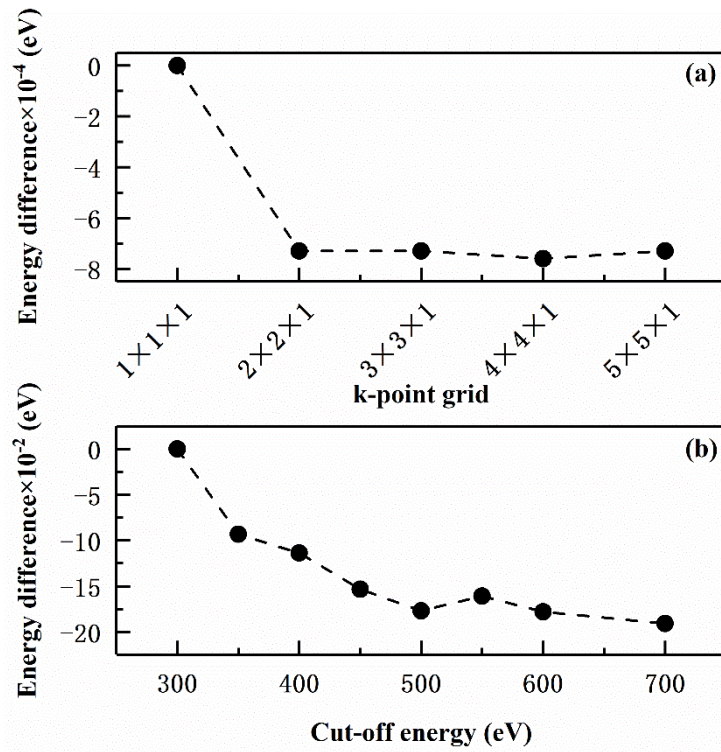

Fig. S1 Convergence test for k-point grid and cut-off energy.

We performed convergence tests using  $V_S\text{-HfS}_2$  as an example, and the results are shown in Fig. S1. The y-axis represents the energy differences compared to the first test (k-point of  $1 \times 1 \times 1$  and a plane wave cut-off energy of 300 eV).

As shown in Fig. S1(a), there is minimal energy variation between using a k-point of  $2 \times 2 \times 1$  and the one using a larger k-point, indicating that using a  $3 \times 3 \times 1$  k-point mesh in the SCF is reasonable.

Regarding the convergence test for the cut-off energy in Fig. S1(b), it was found that the energy converges when the cut-off energy larger than 450 eV, therefore the 500 eV we used meets the required precision for the calculations.

We calculated the defect formation energies ( $E_{df}$ ) and formation energies ( $E_f$ ) to investigate the stability of  $\text{HfX}_2$  ( $X = \text{S}, \text{Se}, \text{Te}$ ).

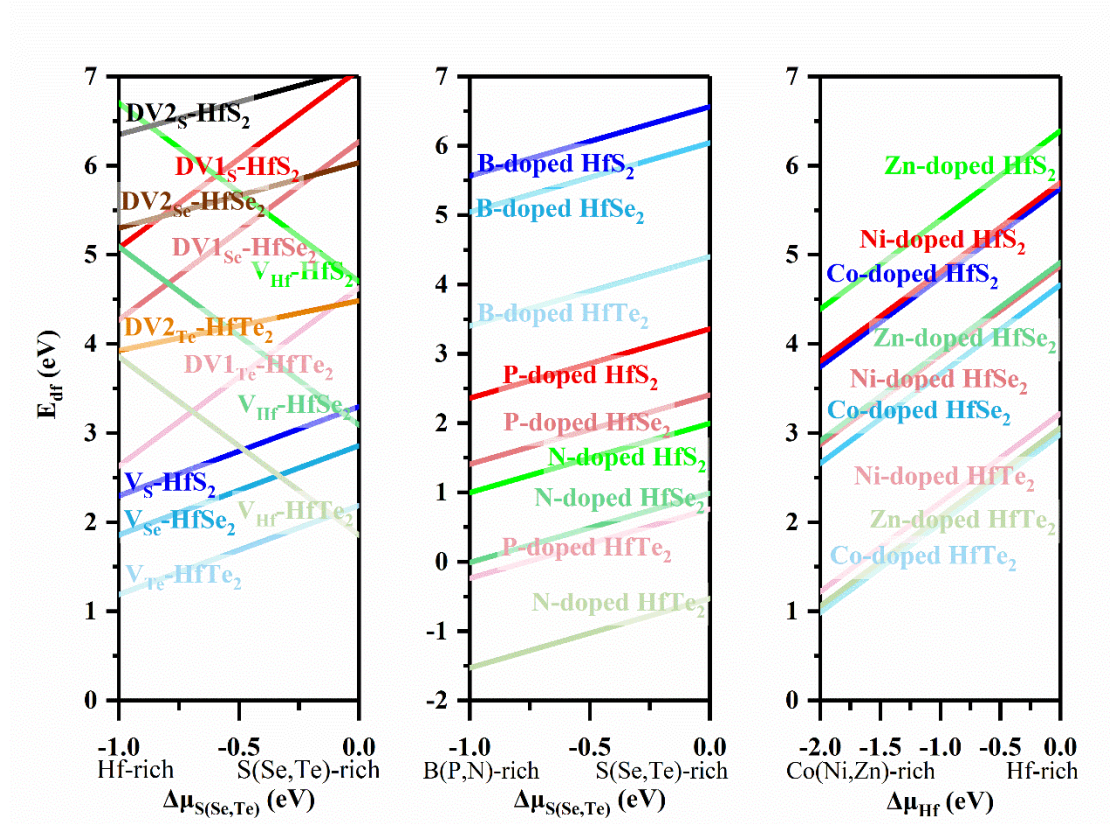

Fig. S2 The defect formation energies ( $E_{df}$ ) of all defect structures.

The defect formation energy is calculated by the following equation:

$$E_{df} = E_D - E_P + \sum \Delta n_i \mu_i, \quad (1)$$

where  $E_D$  is the energy of defect structures and  $E_P$  is the energy of pristine structures,  $\mu_i$  is the chemical potential of different atom species  $i$ , and  $\Delta n_i$  is the difference in atom species  $i$  between defective and pristine structures. Take Co-doped  $\text{HfS}_2$  as an example, we consider Hf as a testing parameter. To maintain thermodynamic equilibrium ( $\mu_{\text{HfS}_2} = 16\mu_{\text{Hf}} + 32\mu_{\text{S}}$ ), the scope of  $\mu_{\text{Hf}}$  is set to  $\frac{E_{\text{HfS}_2} - 32E_{\text{S}(bulk)}}{16} < \mu_{\text{Hf}} < E_{\text{Hf}(bulk)}$ , where the upper limit corresponds to Hf-rich and the lower limit represents Co-rich (i.e., Hf-poor). In Fig. S2, it can be observed that the formation of most defects requires the absorption of heat.

Take Co-doped HfS<sub>2</sub> as an example, the  $E_f$  is calculated by the following equation:

$$E_f = \frac{E_{(Co-doped\ HfS_2)} - (15\mu_{Hf} + \mu_{Co} + 32\mu_S)}{48}, \quad (2)$$

where  $E_{(Co-doped\ HfS_2)}$  is the total energy of the monolayer Co-doped HfS<sub>2</sub> in the super cell,  $\mu_{Hf}$ ,  $\mu_{Co}$ , and  $\mu_S$  are the chemical potentials of Hf, Co, and S atoms, which were derived from the most stable phase, and “48” is the total number of atoms in the supercell. The formation energies of all structures shown in Table S1 are negative, indicating all the structures could exist at ambient pressure.

Table S1 The formation energy (eV) of defect structures.

| The formation energy (eV)    | HfS <sub>2</sub> | HfSe <sub>2</sub> | HfTe <sub>2</sub> |
|------------------------------|------------------|-------------------|-------------------|
| <b>Pristine</b>              | <b>-1.59</b>     | <b>-1.35</b>      | <b>-0.81</b>      |
| <b>V<sub>S/Se/Te</sub></b>   | <b>-1.52</b>     | <b>-1.29</b>      | <b>-0.77</b>      |
| <b>DV1<sub>S/Se/Te</sub></b> | <b>-1.47</b>     | <b>-1.24</b>      | <b>-0.73</b>      |
| <b>DV2<sub>S/Se/Te</sub></b> | <b>-1.47</b>     | <b>-1.25</b>      | <b>-0.73</b>      |
| <b>V<sub>Hf</sub></b>        | <b>-1.39</b>     | <b>-1.20</b>      | <b>-0.72</b>      |
| <b>B-doped</b>               | <b>-1.37</b>     | <b>-1.15</b>      | <b>-0.66</b>      |
| <b>Co-doped</b>              | <b>-1.47</b>     | <b>-1.25</b>      | <b>-0.75</b>      |
| <b>N-doped</b>               | <b>-1.55</b>     | <b>-1.33</b>      | <b>-0.82</b>      |
| <b>Ni-doped</b>              | <b>-1.47</b>     | <b>-1.25</b>      | <b>-0.75</b>      |
| <b>P-doped</b>               | <b>-1.52</b>     | <b>-1.30</b>      | <b>-0.80</b>      |
| <b>Zn-doped</b>              | <b>-1.46</b>     | <b>-1.25</b>      | <b>-0.75</b>      |

The corresponding content has been added to the Supplementary Information.

Table S2 The adsorption energy (eV) of H possible sites of pristine and defective structures shown in Fig. 1.

| Defect type                                          | Vacancy type<br>/Doped atom | H-adsorption sites | HfS <sub>2</sub> | HfSe <sub>2</sub> | HfTe <sub>2</sub> |
|------------------------------------------------------|-----------------------------|--------------------|------------------|-------------------|-------------------|
| pristine                                             | /                           | site 1             | 1.10             | 1.32              | 1.25              |
|                                                      |                             | site 2             | 1.75             | 1.50              | 0.91              |
| single vacancy of<br>nonmetallic atom                | V <sub>S/Se/Te</sub>        | site 1             | 0.22             | 2.29              | 0.45              |
|                                                      |                             | site 2             | 0.22             | 0.38              | 0.45              |
|                                                      |                             | site 3             | 0.22             | 1.33              | 1.27              |
|                                                      |                             | site 4             | 1.07             | 0.38              | 0.45              |
| double vacancies<br>of nonmetallic<br>atom (type I)  | DV1 <sub>S/Se/Te</sub>      | site 1             | -1.17            | 2.32              | 0.50              |
|                                                      |                             | site 2             | -1.17            | -0.03             | 1.02              |
|                                                      |                             | site 3             | 1.15             | 1.56              | 1.44              |
|                                                      |                             | site 4             | -1.17            | -0.03             | 0.22              |
|                                                      |                             | site 5             | 1.26             | 1.10              | 0.81              |
|                                                      |                             | site 6             | -1.17            | -1.16             | -0.75             |
| double vacancies<br>of nonmetallic<br>atom (type II) | DV2 <sub>S/Se/Te</sub>      | site 1             | -1.14            | 0.92              | 0.62              |
|                                                      |                             | site 2             | 1.90             | 2.07              | 1.78              |
|                                                      |                             | site 3             | 0.29             | 0.70              | 0.56              |
|                                                      |                             | site 4             | 0.22             | 0.84              | 1.55              |
|                                                      |                             | site 5             | 0.22             | 0.27              | 0.29              |
|                                                      |                             | site 6             | 0.21             | 0.24              | 1.11              |
| single vacancy of<br>metallic atom                   | V <sub>Hf</sub>             | site 1             | -1.02            | -0.43             | 0.06              |
|                                                      |                             | site 2             | -1.02            | -0.43             | 0.02              |
|                                                      |                             | site 3             | -1.04            | -0.44             | 0.04              |
|                                                      |                             | site 4             | -1.04            | -0.44             | 0.04              |
| nonmetallic atom<br>doping                           | B                           | site 1             | -1.33            | -1.16             | -1.03             |
|                                                      |                             | site 2             | 1.53             | 1.21              | 0.94              |
|                                                      |                             | site 3             | 0.83             | 1.02              | 1.03              |
|                                                      | N                           | site 1             | -0.79            | -0.08             | 0.70              |
|                                                      |                             | site 2             | 1.74             | 1.85              | 1.03              |
|                                                      |                             | site 3             | 0.05             | 0.81              | 1.30              |
|                                                      | P                           | site 1             | -0.96            | -0.29             | 0.25              |
|                                                      |                             | site 2             | -0.96            | 1.27              | 1.04              |
|                                                      |                             | site 3             | 0.19             | 0.86              | 1.29              |
| metallic atom<br>doping                              | Co                          | site 1             | 0.19             | 0.59              | 0.94              |
|                                                      |                             | site 2             | -0.27            | 0.60              | 1.15              |
|                                                      |                             | site 3             | 1.29             | 1.37              | 1.10              |
|                                                      | Ni                          | site 1             | 1.14             | 1.11              | 1.00              |
|                                                      |                             | site 2             | 0.26             | 0.66              | 0.94              |
|                                                      |                             | site 3             | 1.66             | 1.41              | 0.78              |
|                                                      | Zn                          | site 1             | 0.69             | 0.87              | 1.09              |
|                                                      |                             | site 2             | -0.47            | 0.19              | 0.69              |
|                                                      |                             | site 3             | 1.04             | 1.09              | 1.06              |



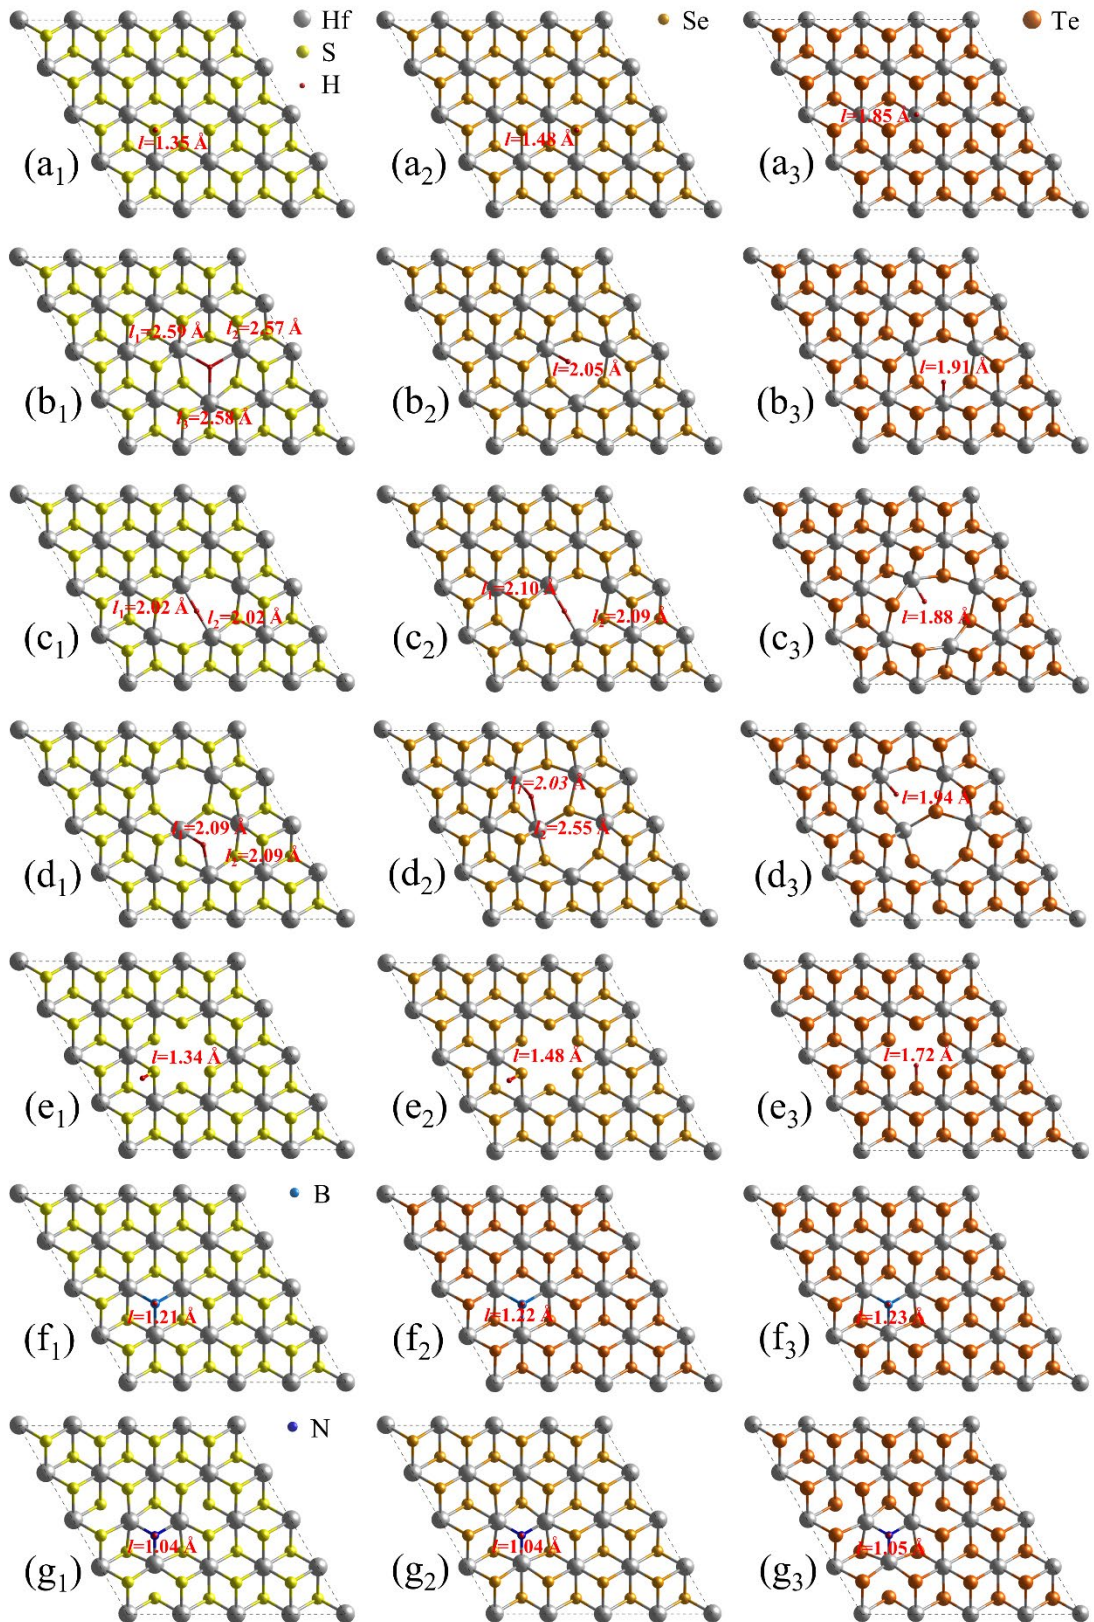

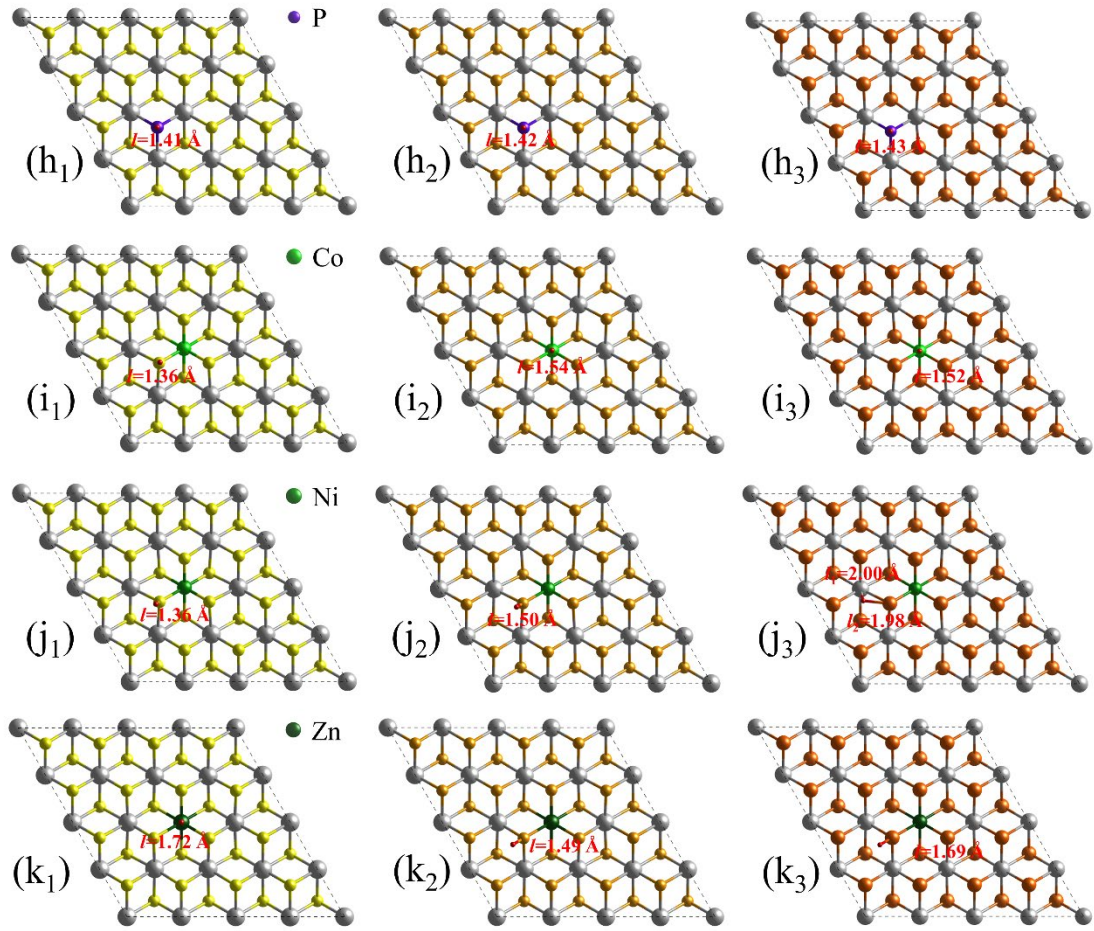

Fig. S3 The structures after optimized and the bond lengths( $l$ ) between H atom and catalyst.

In Fig. S3, (a) represent the structures of pristine, (b-e) represent the structures with single vacancy of nonmetallic atom, double vacancies of nonmetallic atom (type I), double vacancies of nonmetallic atom (type II) and single vacancy of metallic atom respectively, (f-k) represent the structures with B, N, P, Co, Ni or Zn atom doping respectively. The subscripts 1, 2, and 3 correspond to the host material is  $\text{HfS}_2$ ,  $\text{HfSe}_2$ , and  $\text{HfTe}_2$ , respectively.

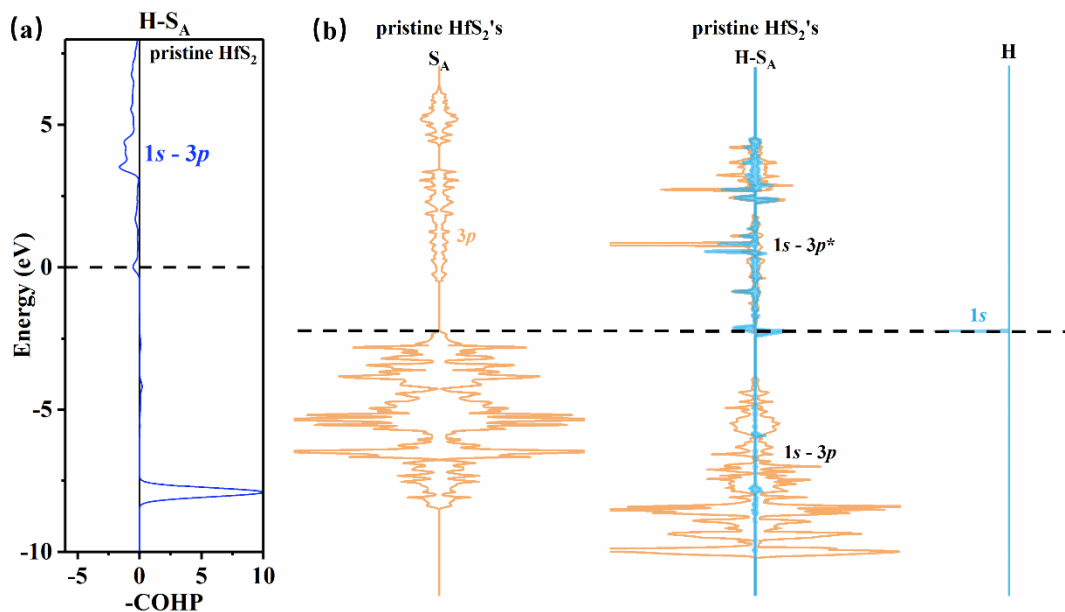

Fig. S4 The pCOHP (a) of H-S<sub>A</sub> bonds of pristine HfS<sub>2</sub>. The pDOS (b) of 3*p* orbitals of the S<sub>A</sub> atom on pristine HfS<sub>2</sub>, 1*s* orbital of H atom and their interaction.

In our analysis of Fig. 3(b), the interaction between the active site S atom (S<sub>A</sub> atom) and the H atom will form the bonding and antibonding orbitals. For the pristine HfS<sub>2</sub>'s H-S<sub>A</sub> bonds, the bonding orbital is completely filled with electrons, while the antibonding orbital is partially filled with electrons.

The projected crystal orbital Hamilton population (pCOHP) is to demonstrate the formation of bonding and antibonding orbitals (Fig. S4(a)). Additionally, we have plotted a comparison of the projected electronic density of states (pDOS) (Fig. S4(b)) to illustrate how the H atom interact with the monolayer.

The pCOHP of the H-S<sub>A</sub> bonds is shown in Fig. S4(a). It is evident that a small part of the antibonding orbital of the 1*s* - 3*p* interaction is below the Fermi level, indicating partial occupation, thereby confirming our analysis: The 1*s* orbital of the H atom hybridizes with the 3*p* orbitals of the S<sub>A</sub> atom, resulting in the formation of bonding and antibonding orbitals (Fig. S4(b)). The bonding orbital (1*s* - 3*p*) is completely filled with electrons, while the antibonding orbital (1*s* - 3*p*<sup>\*</sup>) is partially filled with electrons.



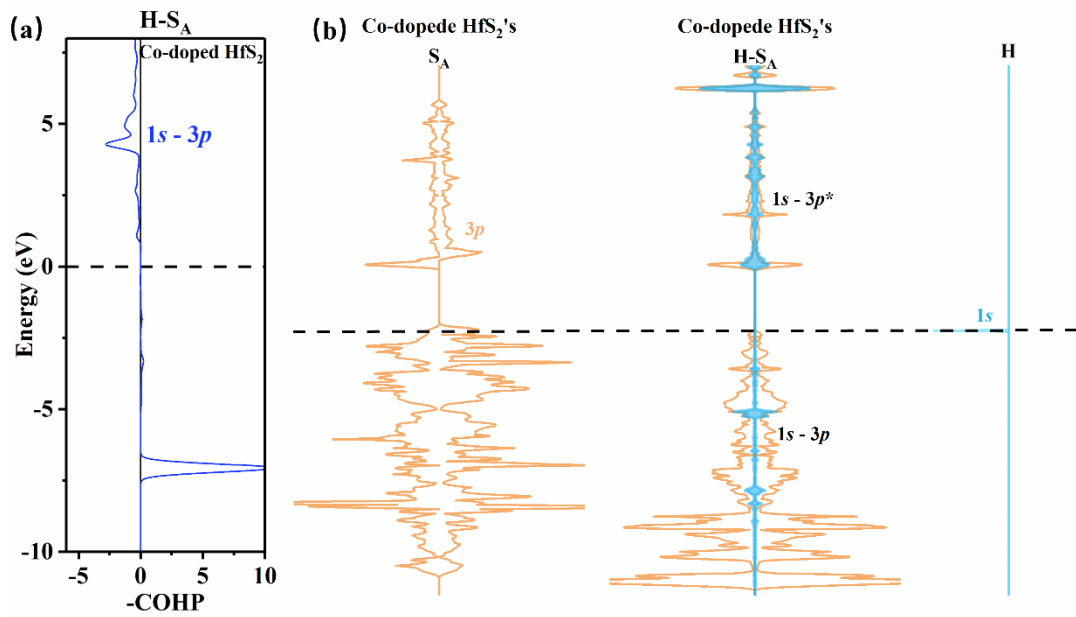

Fig. S5 The pCOHP (a) of H-S<sub>A</sub> bonds of Co-doped HfS<sub>2</sub>. The pDOS (b) of 3*p* orbitals of the S<sub>A</sub> atom on Co-doped HfS<sub>2</sub>, 1*s* orbital of H atom and their interaction.

In Fig. 3(b), the interaction between the S<sub>A</sub> atom of Co-doped HfS<sub>2</sub> and the H atom form the bonding and antibonding orbitals. The bonding orbital is completely filled with electrons, while there is no electron filled in the antibonding orbital.

By observing the pCOHP of the H-S<sub>A</sub> bonds in Fig. S5(a), the antibonding orbital of the 1*s* - 3*p* is completely situated above the Fermi level, with no electron filled with, and the bonding orbital is completely filled with electrons, confirming our inference: The 1*s* orbital of the H atom hybridizes with the 3*p* orbitals of the S<sub>A</sub> atom, resulting in the formation of bonding and antibonding orbitals (Fig. S5(b)). The bonding orbital (1*s* - 3*p*) is completely filled with electrons, while there is no electron fill in the antibonding orbital (1*s* - 3*p*<sup>\*</sup>).

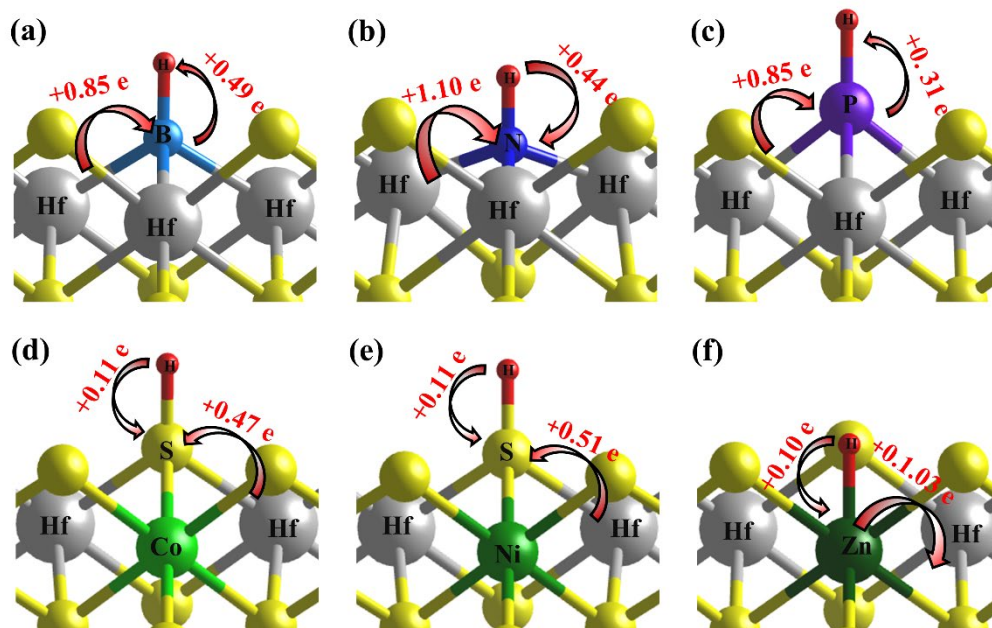

Fig. S6 The charge transfers of HfS<sub>2</sub> with B(a), N(b), P(c), Co(d), Ni(e), Zn(f) atom doping, respectively.

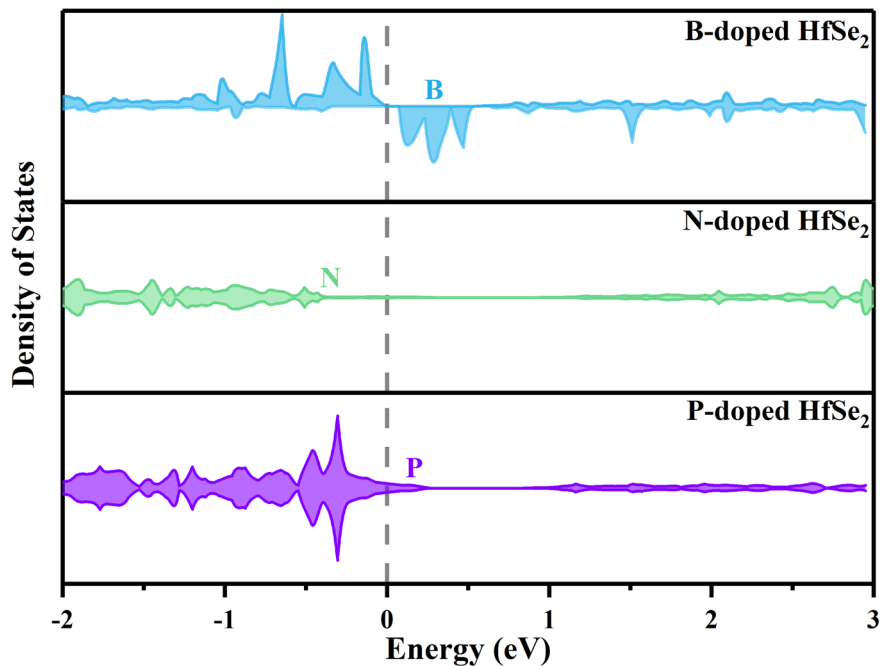

Fig. S7 The density of states of non-metallic atom-doped HfSe<sub>2</sub>'s doping atom.

The greater the number of empty states near the Fermi level (where the 1s state of H atom located), the stronger the interaction between H atom and those states<sup>1</sup>. We have conducted an analysis of non-metallic atom-doped HfSe<sub>2</sub>'s electronic structure. As shown in Fig. S7, the introduction of B atoms induces a substantial number of defect states above the Fermi level, allowing for a strong interaction with H atom, which makes the desorption of generated hydrogen difficult ( $\Delta E_H = -1.66$  eV,  $\Delta G_H = -0.95$  eV). The N element doping scarcely generates defect states above the Fermi level and indicate N-doped HfSe<sub>2</sub> catalytic inertness ( $\Delta E_H = -0.08$  eV,  $\Delta G_H = 0.26$  eV). Concerning the P element doping, it induces a small amount of unoccupied states above the Fermi level, enabling it to form an appropriate strength of H-P bonds ( $\Delta E_H = -0.29$  eV,  $\Delta G_H = -0.02$  eV). Consequently, P-doped HfSe<sub>2</sub> is an excellent catalyst for hydrogen evolution.

---

## REFERENCES

1. An, Y.; Fan, X.; Liu, H.; Luo, Z., Improved catalytic performance of monolayer nano-triangles WS<sub>2</sub> and MoS<sub>2</sub> on HER by 3d metals doping. *Computational Materials Science* **2019**, *159*, 333-340.
